# Supplementary material for: Clinical mutational profiling of 1006 lung cancers by next generation sequencing
Source: PubMed Central journal article supplement (PMC5722514; doi:10.18632/oncotarget.18042), 2017-05-20
Supplement: oncotarget-08-96684-s001.pdf [file oncotarget-08-96684-s001.pdf]

# Clinical mutational profiling of 1006 lung cancers by next generation sequencing

## Supplementary Materials

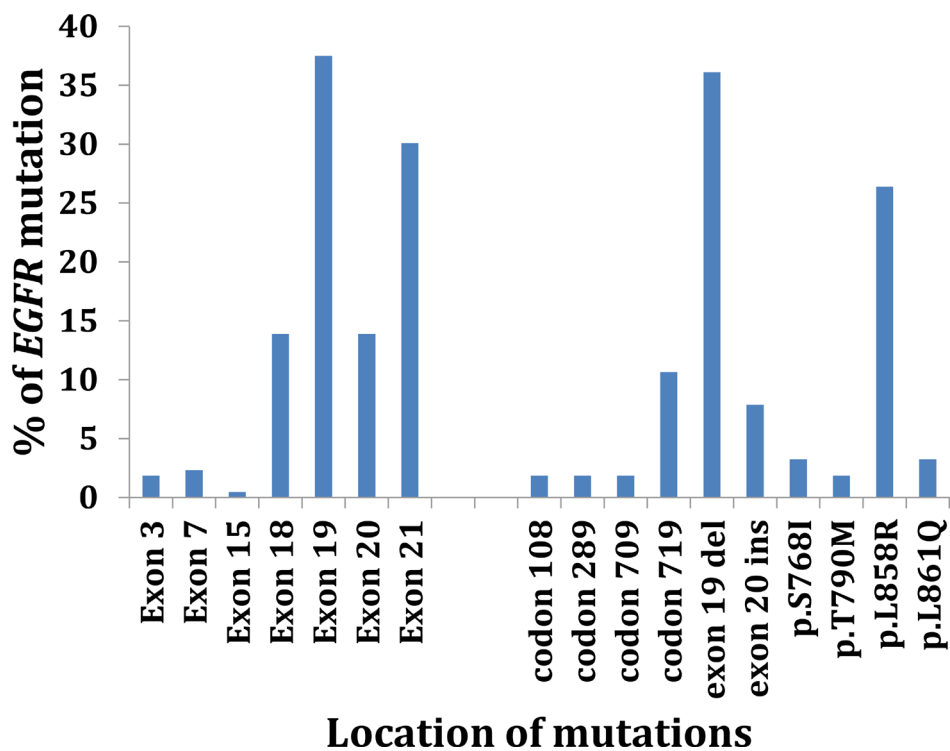

**Supplementary Figure 1: Distribution of 216 EGFR mutations.** The mutations were located within exon 18 in 30 (14%) of 216 EGFR mutations including 11% codon 719 mutations, 38% exon 19 mutations (36% exon 19 deletion mutations), 14% exon 20 mutations (7.9% exon 20 insertion mutations), and 30% exon 21 mutations (26% p.L858R).

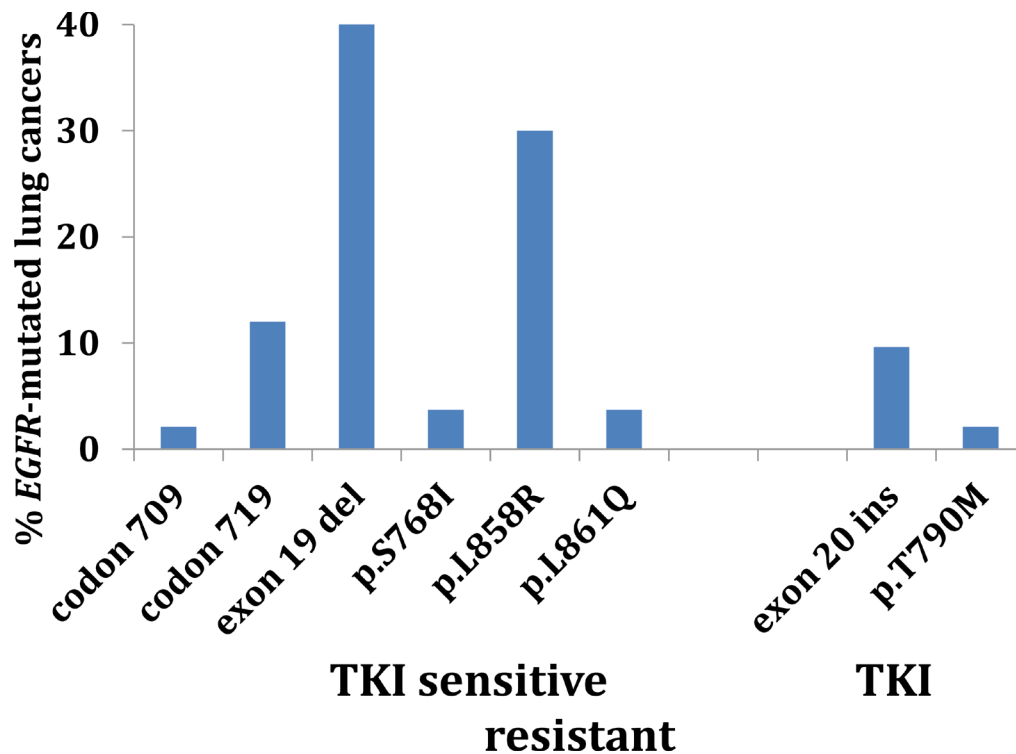

**Supplementary Figure 2: Tyrosine kinase inhibitor (TKI) sensitive or resistant mutations among 187 *EGFR*-mutated lung cancers.** The common TKI-sensitive mutations included exon 19 deletion mutations (42% of 187 *EGFR*-mutated tumors), p.L858R (30%), codon 719 mutations (12%), p.S768I (3.7%), p.L861Q (3.7%) and codon 709 mutations (2.1%). The TKI-resistant mutations within exon 20 included insertion mutations (9.6% of 187 *EGFR*-mutated tumors) and p.T790M (2.1%).

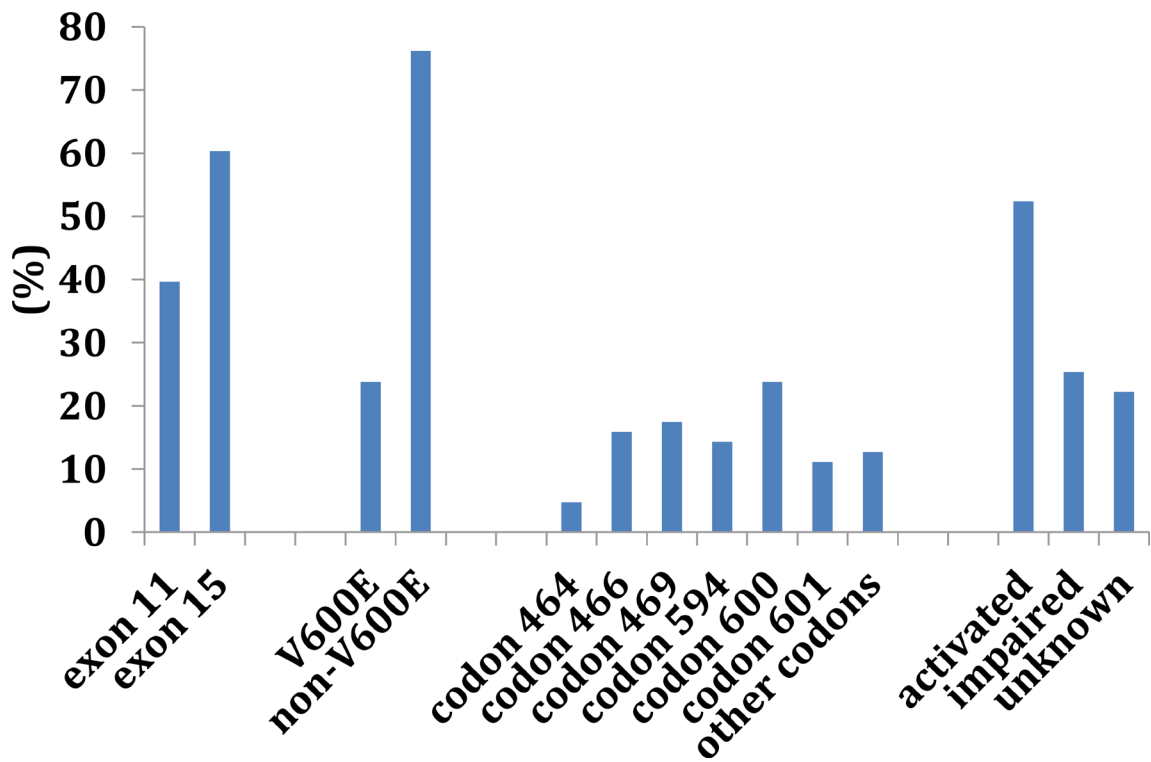

Supplementary Figure 3: Distribution of *BRAF* mutations according to location and BRAF kinase activity.

**Supplementary Table 1: Mutant allele frequency of positive control specimens<sup>a</sup>**

| Mutations              | Lung cancel panel control ( <i>n</i> = 43) <sup>b</sup> |
|------------------------|---------------------------------------------------------|
| <i>AKT1</i> p.E17K     | 7.2 ± 1.0%                                              |
| <i>AKT1</i> p.E49K     | 7.1 ± 1.0%                                              |
| <i>BRAF</i> p.V600E    | 12.1 ± 1.0%                                             |
| <i>EGFR</i> p.T790M    | 9.4 ± 1.3%                                              |
| <i>EGFR</i> p.L858R    | 6.1 ± 1.0%                                              |
| <i>ERBB2</i> p.G776V   | 8.4 ± 0.8%                                              |
| <i>KRAS</i> p.G12C     | 21.8 ± 1.2%                                             |
| <i>KRAS</i> p.P121H    | 7.8 ± 0.8%                                              |
| <i>NRAS</i> p.Q61R     | 9.1 ± 0.8%                                              |
| <i>PIK3CA</i> p.H111E  | 6.7 ± 1.1%                                              |
| <i>PIK3CA</i> p.H1047R | 14.4 ± 1.1%                                             |

<sup>a</sup>Only results between July 2015 and June 2016 are included. Results before July 2015 have been reported previously [27, 34].

<sup>b</sup>Mean ± standard deviation.

**Supplementary Table 2: *EGFR* mutations in 1006 lung cancers. See Supplementary\_Table\_2**

**Supplementary Table 3: *KRAS* and *NRAS* mutations in 1006 lung cancers**

| Gene        | cDNA change                | Amino acid change   | Exon | Number of case |
|-------------|----------------------------|---------------------|------|----------------|
| <i>KRAS</i> |                            |                     |      |                |
|             | c.15A>T                    | p.K5N               | 2    | 1              |
|             | c.22G>A                    | p.V8I <sup>c</sup>  | 2    | 1              |
|             | c.35G>C                    | p.G12A              | 2    | 24             |
|             | c.34G>T                    | p.G12C              | 2    | 124            |
|             | c.35G>A                    | p.G12D              | 2    | 41             |
|             | c.34_35delinsTT            | p.G12F              | 2    | 8              |
|             | c.34G>C                    | p.G12R              | 2    | 4              |
|             | c.34G>A                    | p.G12S              | 2    | 7              |
|             | c.35G>T                    | p.G12V              | 2    | 81             |
|             | c.37G>T                    | p.G13C              | 2    | 13             |
|             | c.38G>A                    | p.G13D              | 2    | 20             |
|             | c.97G>C                    | p.D33H <sup>c</sup> | 2    | 1              |
|             | c.97G>T                    | p.D33Y <sup>c</sup> | 2    | 1              |
|             | c.127C>G                   | p.Q43E <sup>c</sup> | 3    | 1              |
|             | c.183A>C or T <sup>a</sup> | p.Q61H              | 3    | 25             |
|             | c.182A>T <sup>b</sup>      | p.Q61L              | 3    | 6              |
|             | c.182A>G                   | p.Q61R              | 3    | 1              |
|             | c.436G>A                   | p.A146T             | 4    | 3              |
|             | c.437C>T                   | p.A146V             | 4    | 3              |
| <i>NRAS</i> |                            |                     |      |                |
|             | c.34G>T                    | p.G12C              | 2    | 2              |
|             | c.35G>A                    | p.G12D              | 2    | 4              |
|             | c.143G>C                   | p.G48A <sup>c</sup> | 3    | 1              |
|             | c.183A>T                   | p.Q61H              | 3    | 1              |
|             | c.182A>T                   | p.Q61L              | 3    | 2              |
|             | c.182A>G                   | p.Q61R              | 3    | 1              |

<sup>a</sup>10 with c.183A>C and 15 with c.183A>T.

<sup>b</sup>One with c.182\_183delinsTG and 5 with c.182A>T.

<sup>c</sup>Not reported in the COSMIC database.

**Supplementary Table 4: *BRAF* mutations in 1006 lung cancers**

| cDNA change         | Amino acid change    | Exon | Number of case <sup>a</sup> | kinase activity <sup>b</sup> |
|---------------------|----------------------|------|-----------------------------|------------------------------|
| c.1391G>T           | p.G464V              | 11   | 3 (2)                       | activated <sup>b</sup>       |
| c.1397G>C           | p.G466A              | 11   | 2 (2)                       | activated <sup>b</sup>       |
| c.1406G>C           | p.G469A              | 11   | 6 (1)                       | activated <sup>b</sup>       |
| c.1785T>A           | p.F595L              | 15   | 1                           | activated <sup>b</sup>       |
| c.1799T>A           | p.V600E              | 15   | 15 (7)                      | activated                    |
| c.1801A>G           | p.K601E              | 15   | 6 (3)                       | activated                    |
| c.1397G>A           | p.G466E              | 11   | 1                           | impaired                     |
| c.1396G>C           | p.G466R              | 11   | 1 (1)                       | impaired                     |
| c.1397G>T           | p.G466V              | 11   | 5 (1)                       | impaired                     |
| c.1781A>G           | p.D594G              | 15   | 5 (4)                       | impaired                     |
| c.1780G>C           | p.D594H              | 15   | 1 (1)                       | impaired                     |
| c.1780G>A           | p.D594N              | 15   | 3 (2)                       | impaired                     |
| c.1319C>T           | p.T440I <sup>c</sup> | 11   | 1 (1)                       | unknown                      |
| c.1396_1397delinsTT | p.G466L <sup>c</sup> | 11   | 1                           | unknown                      |
| c.1405G>A           | p.G469R              | 11   | 1 (1)                       | unknown                      |
| c.1405_1406delinsTC | p.G469S              | 11   | 1 (1)                       | unknown                      |
| c.1406G>T           | p.G469V              | 11   | 3 (1)                       | unknown                      |
| c.1762C>T           | p.L588F              | 15   | 1 (1)                       | unknown                      |
| c.1786G>T           | p.G596C              | 15   | 1                           | unknown                      |
| c.1786G>C           | p.G596R              | 15   | 1 (1)                       | unknown                      |
| c.1799_1801del      | p.V600_K601delinE    | 15   | 1 (1)                       | unknown                      |
| c.1803A>T           | p.K601N              | 15   | 1                           | unknown                      |
| c.1825_1826delinsTT | p.Q609L <sup>c</sup> | 15   | 1 (1)                       | unknown                      |
| c.1831G>C           | p.E611Q <sup>c</sup> | 15   | 1 (1)                       | unknown                      |

<sup>a</sup>Number in the parentheses indicates the number of *BRAF*-mutated lung cancers detected before September 2014 [22].

<sup>b</sup>Categorized as intermediate activity mutants by Wan et al. [19].

<sup>c</sup>Not reported in the COSMIC database.

**Supplementary Table 5: *AKT1*, *PIK3CA* and *ERBB2* mutations in 1006 lung cancers**

| Gene          | cDNA change       | Amino acid change           | Exon | Number of case |
|---------------|-------------------|-----------------------------|------|----------------|
| <i>AKT1</i>   |                   |                             |      |                |
|               | c.49G>A           | p.E17K                      | 3    | 3              |
|               | c.74G>A           | p.R25H <sup>a</sup>         | 3    | 1              |
| <i>PIK3CA</i> |                   |                             |      |                |
|               | c.263G>A          | p.R88Q                      | 1    | 1              |
|               | c.1028A>T         | p.Y343F                     | 4    | 1              |
|               | c.1031T>G         | p.V344G                     | 4    | 1              |
|               | c.1034A>T         | p.N345I                     | 4    | 1              |
|               | c.1048G>A         | p.D350N                     | 4    | 1              |
|               | c.1193G>T         | p.R398L <sup>a</sup>        | 6    | 1              |
|               | c.1201C>T         | p.R401 <sup>*a</sup>        | 6    | 1              |
|               | c.1348C>G         | p.H450D <sup>a</sup>        | 7    | 1              |
|               | c.1624G>A         | p.E542K                     | 9    | 6              |
|               | c.1357G>A         | p.E453K                     | 9    | 1              |
|               | c.1634A>C         | p.E545A                     | 9    | 1              |
|               | c.1633G>A         | p.E545K                     | 9    | 11             |
|               | c.1637A>T         | p.Q546L                     | 9    | 1              |
|               | c.1637A>C         | p.Q546P                     | 9    | 1              |
|               | c.3140A>G         | p.H1047R                    | 20   | 6              |
|               | c.3143A>G         | p.H1048R                    | 20   | 1              |
|               | c.3145G>C         | p.G1049R                    | 20   | 1              |
| <i>ERBB2</i>  |                   |                             |      |                |
|               | c.2270A>G         | p.E757G <sup>a</sup>        | 19   | 1              |
|               | c.2313_2324dup    | p.A771_M774dup              | 20   | 8              |
|               | c.2326_2327insTGT | p.G776delinsVC              | 20   | 1              |
|               | c.2327delinsTCGT  | p.G776delinsVV <sup>a</sup> | 20   | 1              |
|               | c.2331-2339dup    | p.G778_P780dup              | 20   | 2              |

<sup>a</sup>Not reported in the COSMIC database.

**Supplementary Table 6: 1103 specimens with lung cancers**

|                           | <b>Total</b> | <b>Failed NGS<sup>a</sup></b> |
|---------------------------|--------------|-------------------------------|
| Resection/excision biopsy | 499          | 4 (0.8%)                      |
| lung                      | 361          | 1                             |
| brain                     | 62           | 0                             |
| pleura                    | 32           | 0                             |
| lymph node                | 24           | 0                             |
| bone                      | 6            | 3                             |
| liver                     | 3            | 0                             |
| pericardium               | 3            | 0                             |
| others                    | 8            | 0                             |
| Core biopsy               | 341          | 20 (5.9%)                     |
| lung                      | 251          | 12                            |
| lymph node                | 37           | 1                             |
| liver                     | 19           | 1                             |
| bone                      | 12           | 3                             |
| adrenal gland             | 4            | 1                             |
| others                    | 18           | 2                             |
| Fine needle aspiration    | 204          | 3 (1.5%)                      |
| lymph node                | 140          | 1                             |
| lung                      | 57           | 1                             |
| bone                      | 3            | 1                             |
| others                    | 4            | 0                             |
| Effusion                  | 55           | 0 (0%)                        |
| pleural effusion          | 50           | 0                             |
| pericardial effusion      | 5            | 0                             |
| Bronchial brushing        | 2            | 0                             |
| Bronchoalveolar lavage    | 1            | 1                             |
| Curettings of bone        | 1            | 1                             |

<sup>a</sup>Percentage in the parentheses indicates the failure rate.



**Supplementary Table 7: 1074 specimens from 1006 tumors of 987 patients with lung cancers**

|                              | <b>Patient (n)</b> | <b>Tumor (n)</b> |
|------------------------------|--------------------|------------------|
| Single specimen              | 906                | 906              |
| Paired specimens             | 75                 | 92               |
| Same tumor <sup>a</sup>      | 16                 | 16               |
| Different metastatic site    | 10                 | 10               |
| Primary and metastatic site  | 22                 | 25               |
| same mutation                | 19                 | 19               |
| different mutation           | 3                  | 6                |
| Different lung nodules       | 27                 | 41               |
| same mutation                | 13                 | 13               |
| different mutation           | 14                 | 28               |
| Three specimens <sup>b</sup> | 6                  | 8                |
| Total                        | 987                | 1006             |

<sup>a</sup>Biopsy, fine needle aspiration or resection of the same tumor.

<sup>b</sup>One patient with 3 lung nodules of different mutation status.
